# Supplementary material for: Piperine ameliorates the severity of fibrosis via inhibition of TGF-β/SMAD signaling in a mouse model of chronic pancreatitis
Source: PubMed Central journal article supplement — Mol Med Rep. 2019 Sep 2;20(4):3709–18. doi: 10.3892/mmr.2019.10635 (PMC6755249; doi:10.3892/mmr.2019.10635), 2019-09-02

Figure S1. Effects of piperine on pancreatic acinar cell damage during CP. CP was induced by the administration of six intra-peritoneal injections of cerulein (50  $\mu\text{g}/\text{kg}$ ) at 1-h intervals, 5 days per week, for a total of 3 weeks. Piperine or corn oil was administered orally at 1 h before the first cerulein injection, once a day, 5 times a week for a total of 3 weeks. Groups of mice were euthanized 3 weeks after the beginning of the cerulein treatment. (A) Amylase staining for pancreatic acinar cells. (B) Relative intensity of amylase. Data are represented as means  $\pm$  SEM for 6 mice in each group. Results are representative of three experiments. \* $P < 0.05$  vs. corn oil alone; † $P < 0.05$  vs. CP. Original magnification, x200. CP, chronic pancreatitis.

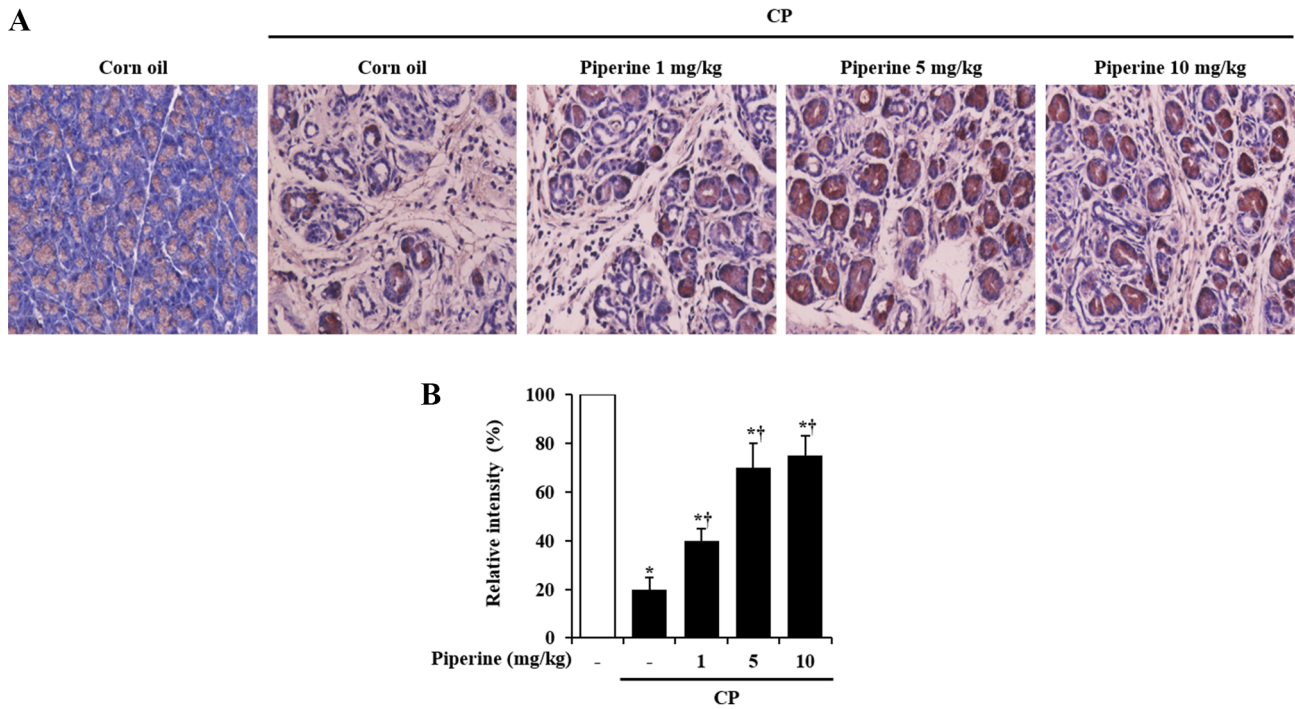

Supplement: Supplementary_Data.pdf [file Supplementary_Data.pdf]
